# Supplementary material for: CEACAM1 induces B-cell survival and is essential for protective antiviral antibody production
Source: PubMed Central journal article supplement (PMC4346637; doi:10.1038/ncomms7217), 2015-02-18
Supplement: ncomms7217-s1.pdf [file ncomms7217-s1.pdf]

# Supplementary Figure 1

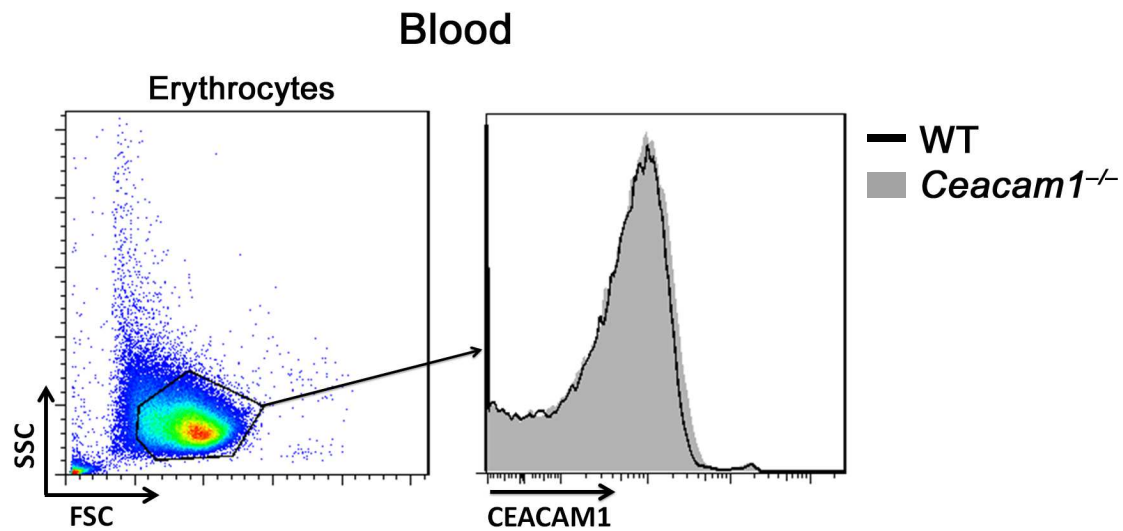

## Supplementary Figure 1: Erythrocytes stain negative for CEACAM1

Representative dot plot and histogram showing CEACAM1 expression in peripheral blood erythrocytes from wild-type (WT, black line) and *Ceacam1*<sup>-/-</sup> mice (grey area) as measured by flow cytometry (n = 3–4 per group).

## Supplementary Figure 2

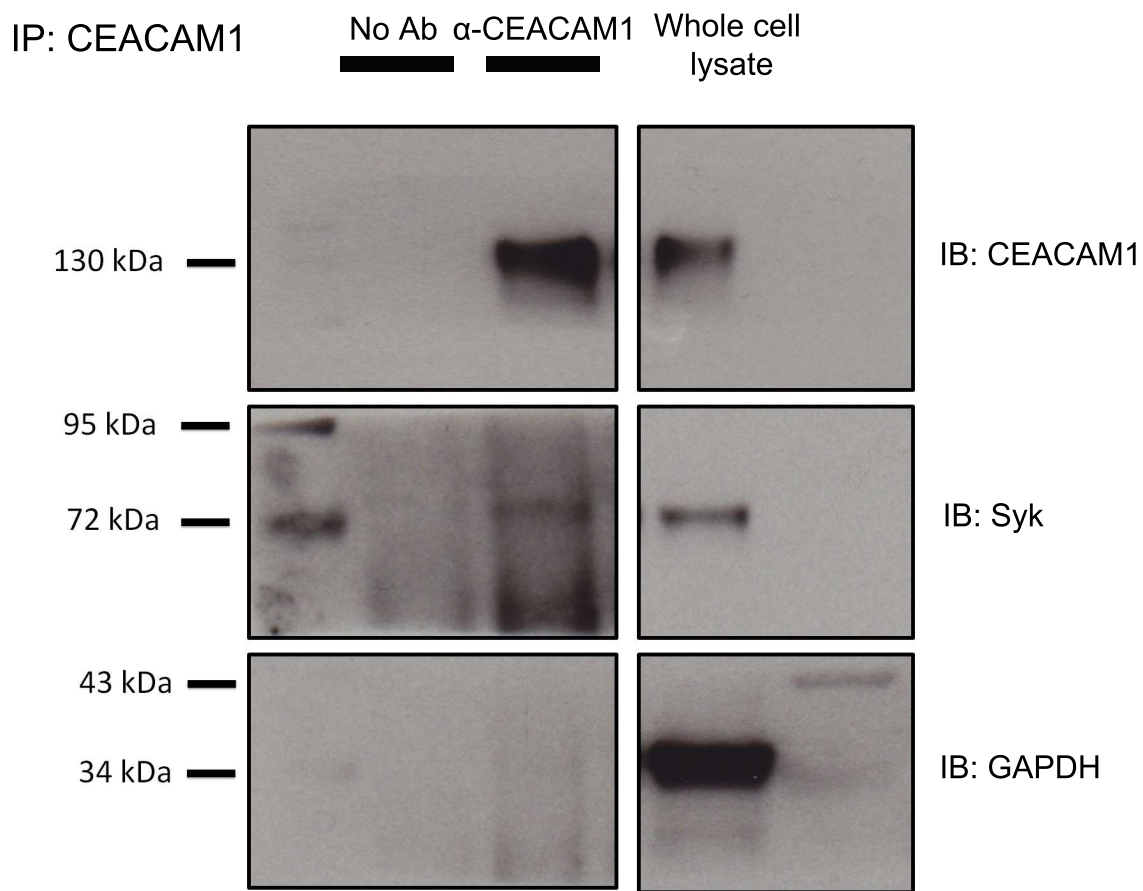

### Supplementary Figure 2: CEACAM1 interacts with Syk

Immunoblot analysis of CEACAM1, Syk and GAPDH in mouse B-lymphocyte from whole cell lysate and after immunoprecipitation with or without anti-CEACAM1 antibody (mAb, CC1). Data are representative of three independent experiments.

# Supplementary Figure 3

**a**

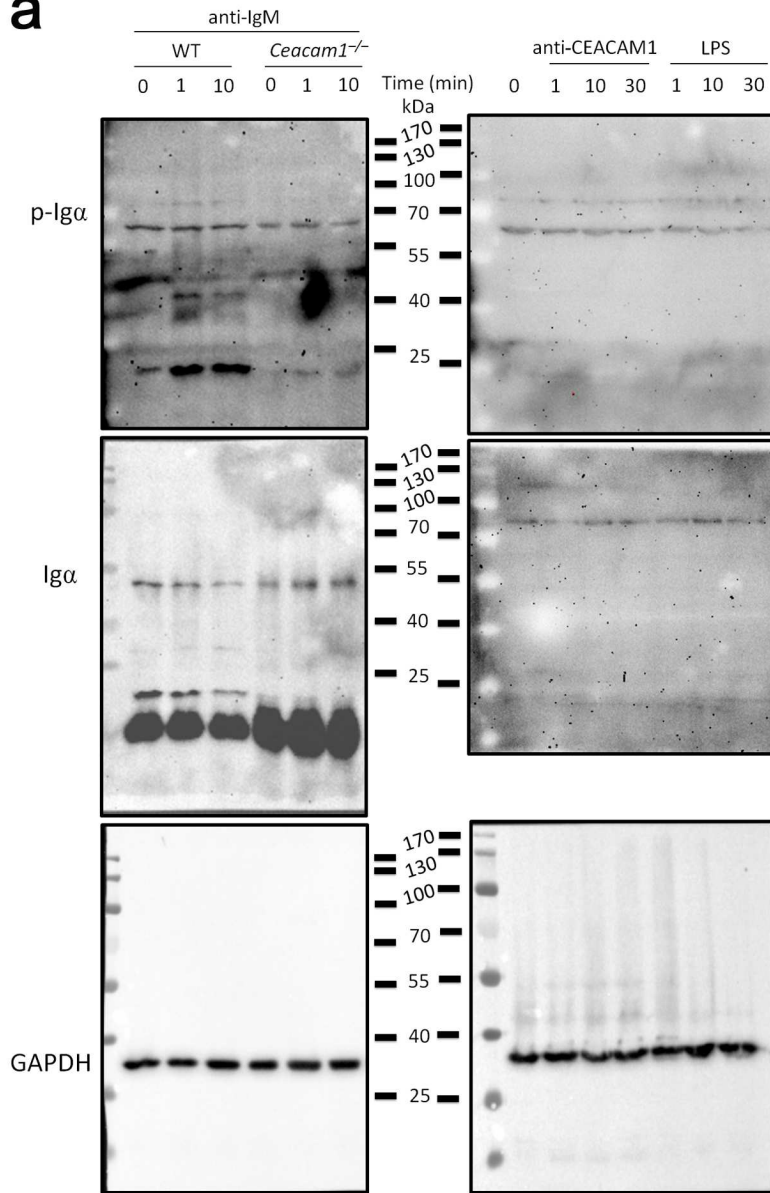

**b**

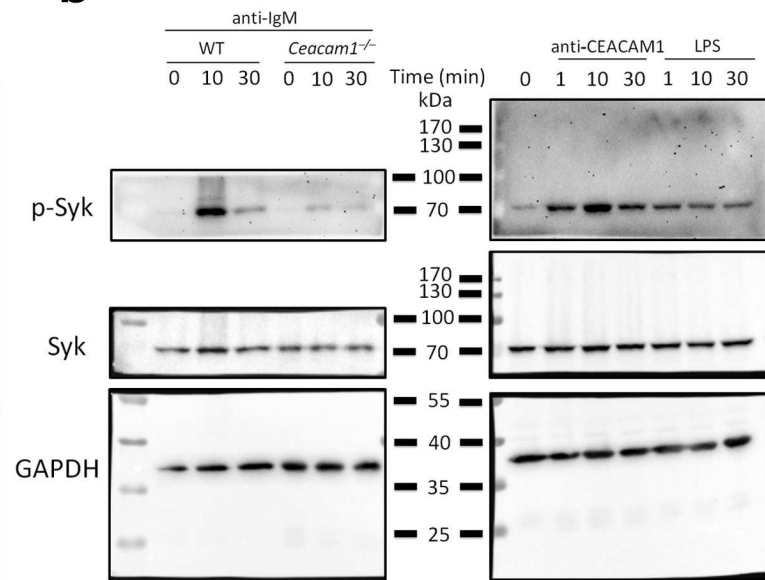

**d**

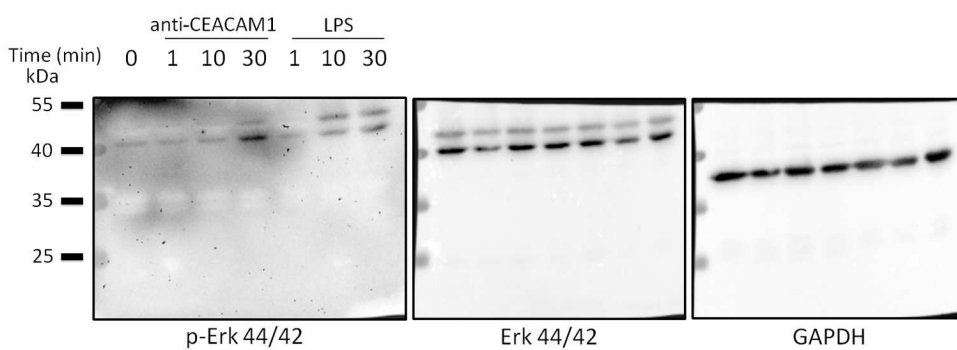

**e**

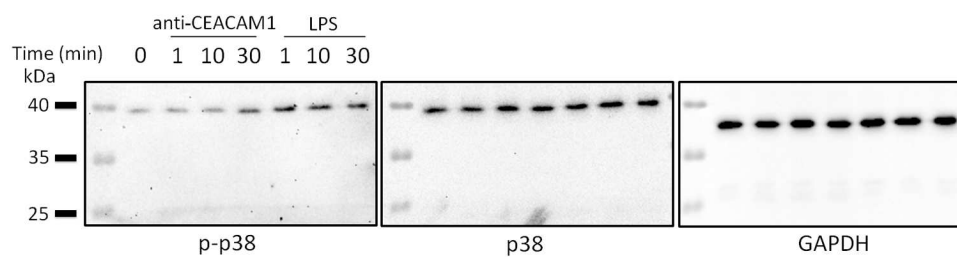

**f**

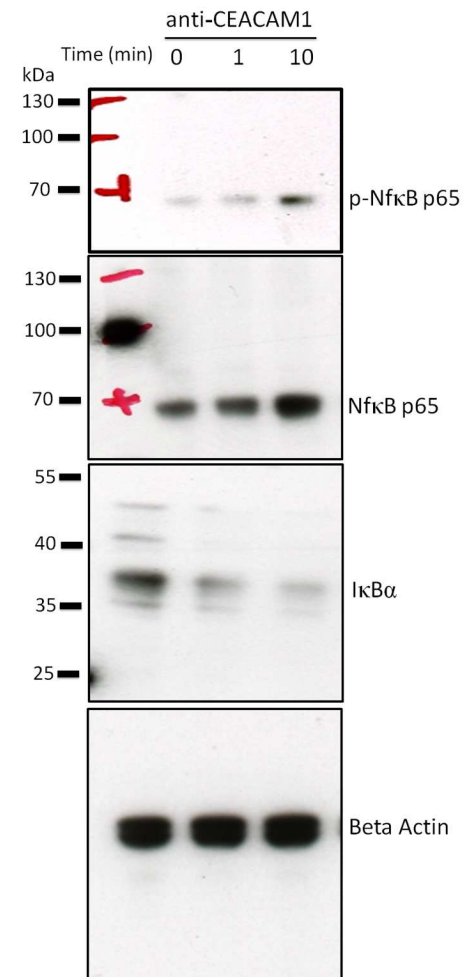

**Supplementary Figure 3:** Uncropped western blots shown in Figure 2. Proteins were loaded on 10% SDS-PAGE gels and transferred onto Whatman nitrocellulose membrane by standard techniques. Nitrocellulose membranes were subsequently developed from left to right.

# Supplementary Figure 4

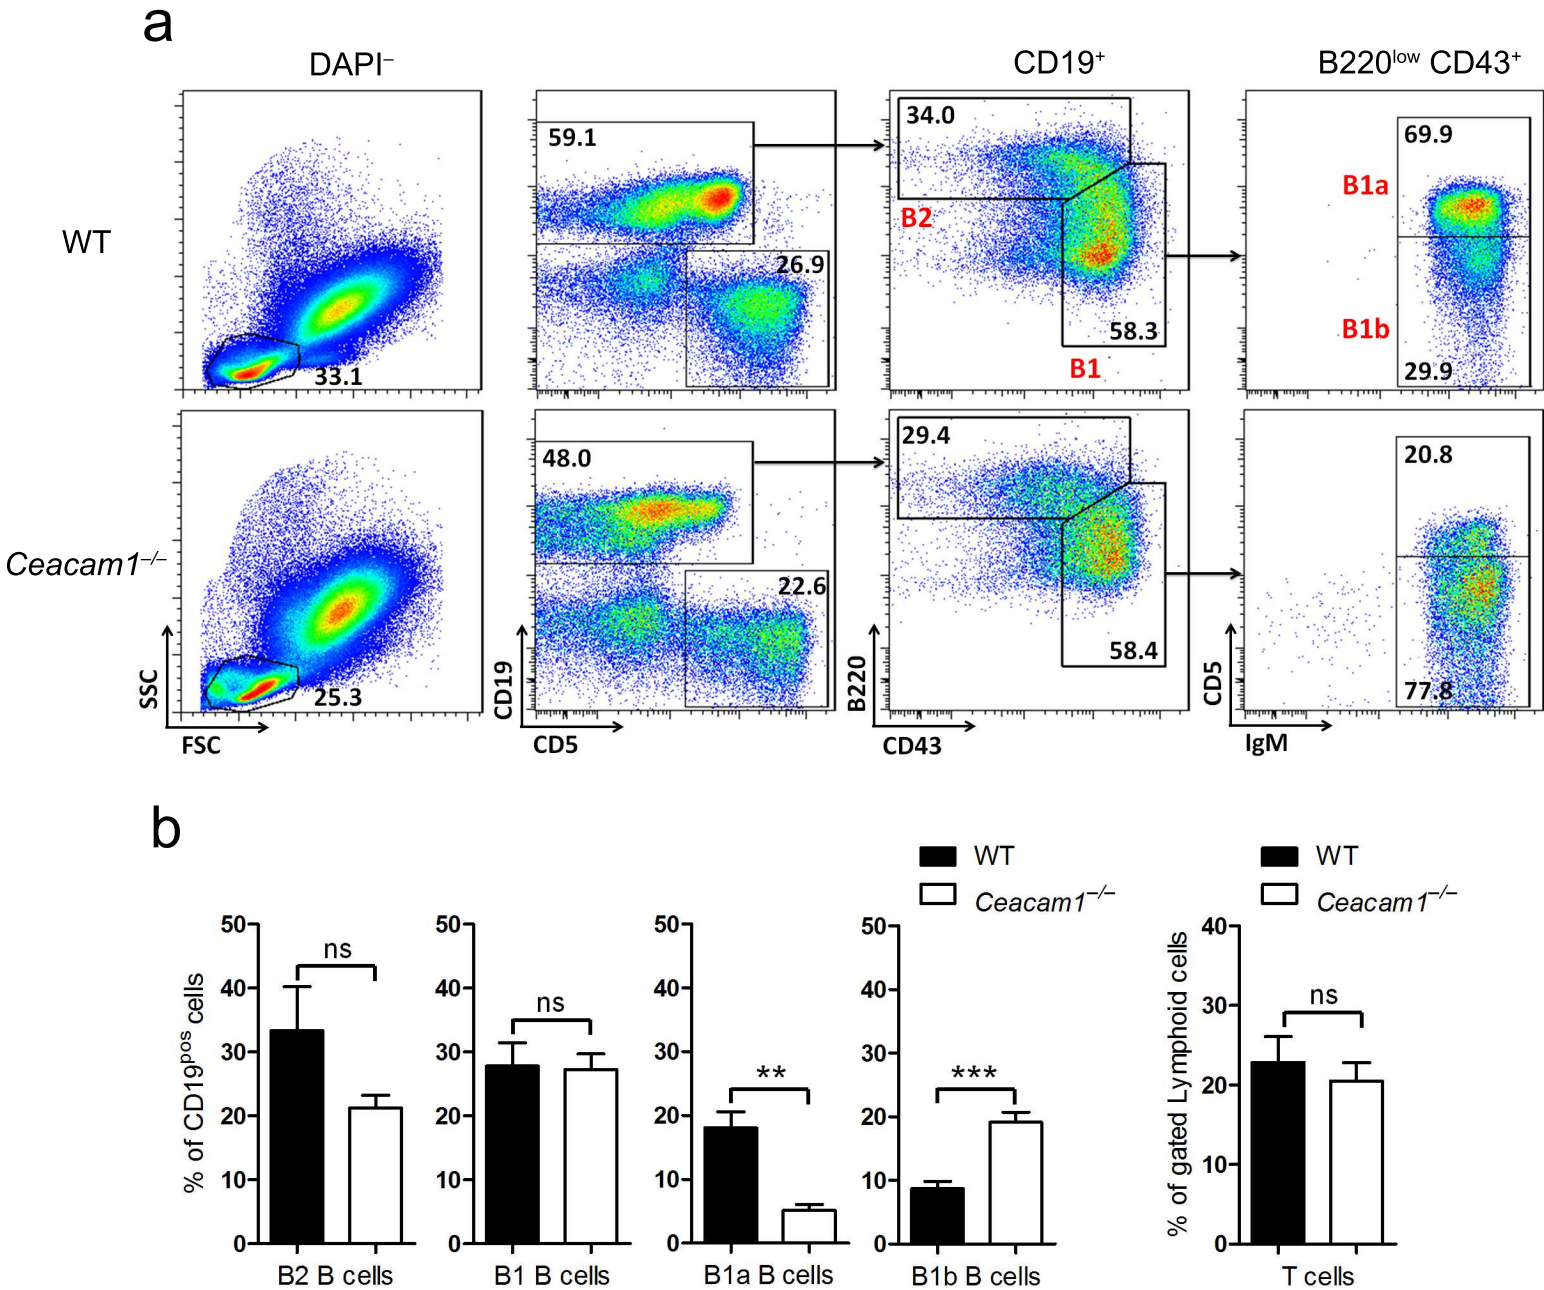

## Supplementary Figure 4: CEACAM1 expression affects B1a B-cell proportion in peritoneum

**a:** Representative dot blots, gating strategy, and percentage of B1 B-cell subpopulations from wild-type (WT) and *Ceacam1*<sup>-/-</sup> mice as measured by flow cytometry in peritoneal cavity (n = 5). **b:** Bar diagram showing average frequencies of indicated subsets calculated from the gates shown above. Numbers in plots represents the percentage of events as a function of indicated parent gate. B2 (CD19<sup>+</sup>B220<sup>+</sup>CD43<sup>-</sup>), B1a (CD19<sup>+</sup>B220<sup>+</sup>CD43<sup>+</sup>CD5<sup>-</sup>), and B1b (CD19<sup>+</sup>B220<sup>+</sup>CD43<sup>+</sup>CD5<sup>+</sup>). \*\**P* < 0.01; and \*\*\**P* < 0.001 (Student's t-test); ns = not significant. Data are representative of two experiments (mean ± SEM).

## Supplementary Figure 5

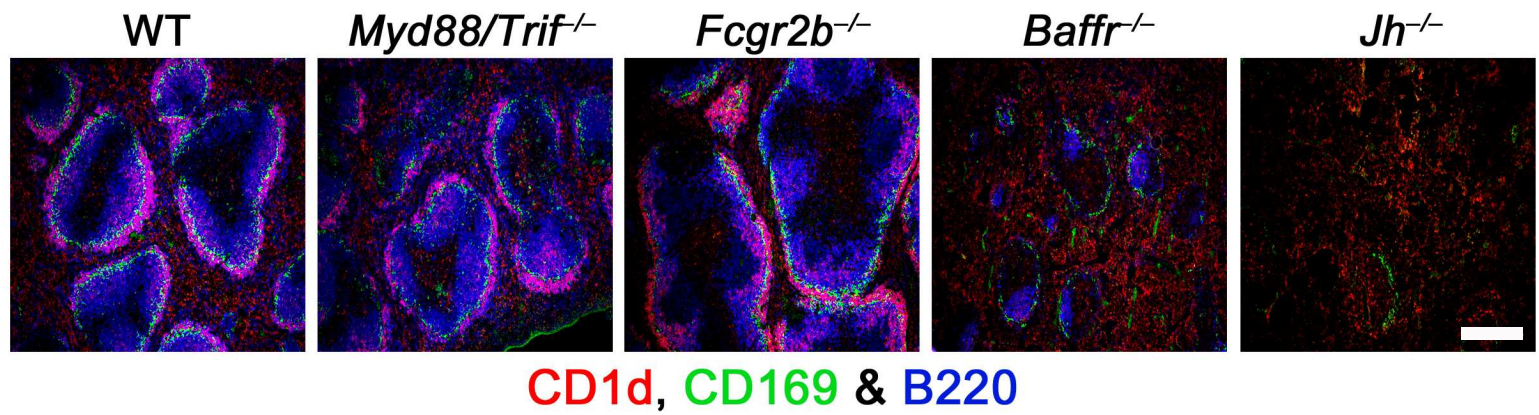

**Supplementary Figure 5: BAFF receptor signaling resembles CEACAM1-mediated signaling**  
Representative immunofluorescence of spleen sections derived from naïve wild-type (WT) (n = 6), *Myd88/Trif*<sup>-/-</sup> (n = 5), *Fcgr2b*<sup>-/-</sup> (n = 6), *Baffr*<sup>-/-</sup> (n = 6), and *Jh*<sup>-/-</sup> (n = 6) mice after staining for marginal zone B cells (CD1d, red), marginal zone macrophages (CD169, green), and B cells (B220, blue). Scale bars, 300µm.

# Supplementary Figure 6

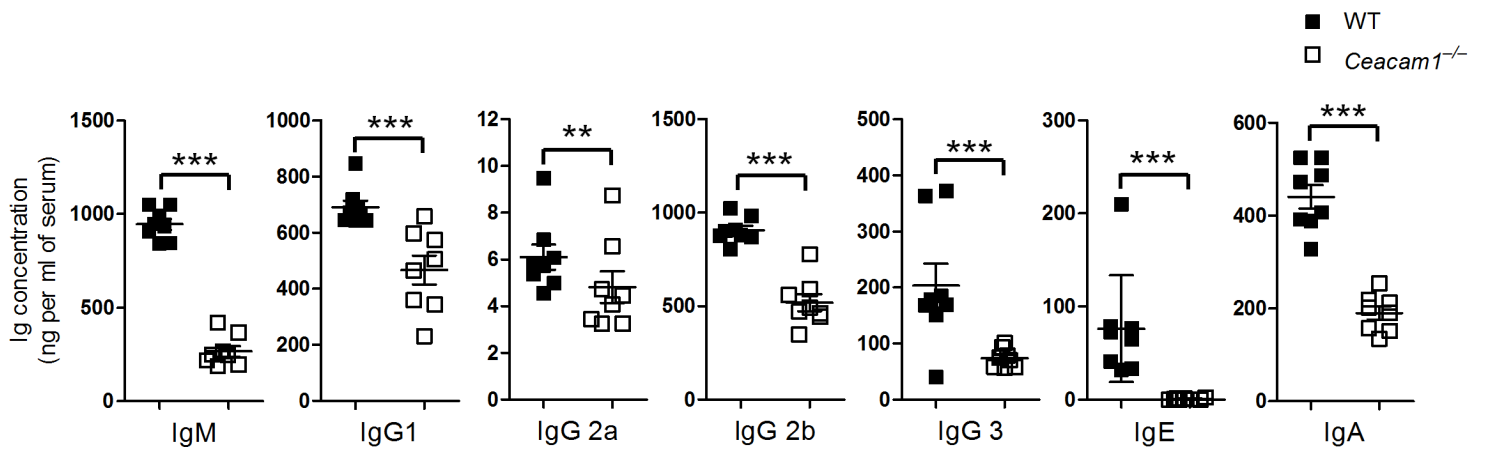

## Supplementary Figure 6: CEACAM1 influences the levels of serum immunoglobulins

Histogram showing levels of various serum immunoglobulin isotypes and subtypes in naïve wild-type (WT) and *Ceacam1*<sup>-/-</sup> mice (n = 8 per genotype). \*\**P* < 0.01; and \*\*\**P* < 0.001 (Student's t-test). Data are representative of two experiments (mean ± SEM).

# Supplementary Figure 7

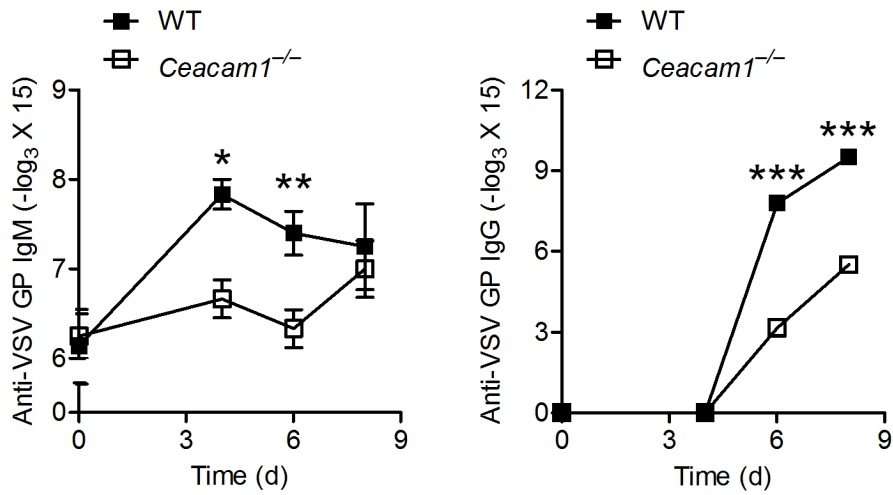

**Supplementary Figure 7: CEACAM1 is essential for anti-VSV-specific Ig production**  
Histogram showing anti-VSV-specific IgM and IgG antibodies generated in wild-type (WT) and *Ceacam1*<sup>-/-</sup> mice after intravenous infection with  $2 \times 10^6$  PFU of VSV ( $n = 4-7$  per group). \* $P < 0.05$ ; \*\* $P < 0.01$ ; and \*\*\* $P < 0.001$  (Student's t-test). Data are representative of two experiments (mean  $\pm$  SEM).

# Supplementary Figure 8

a

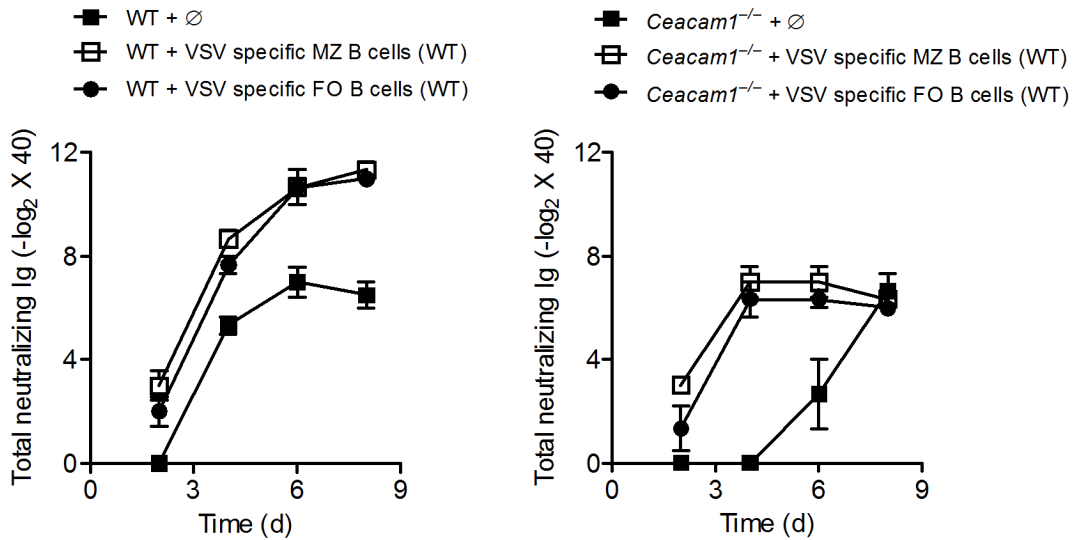

b

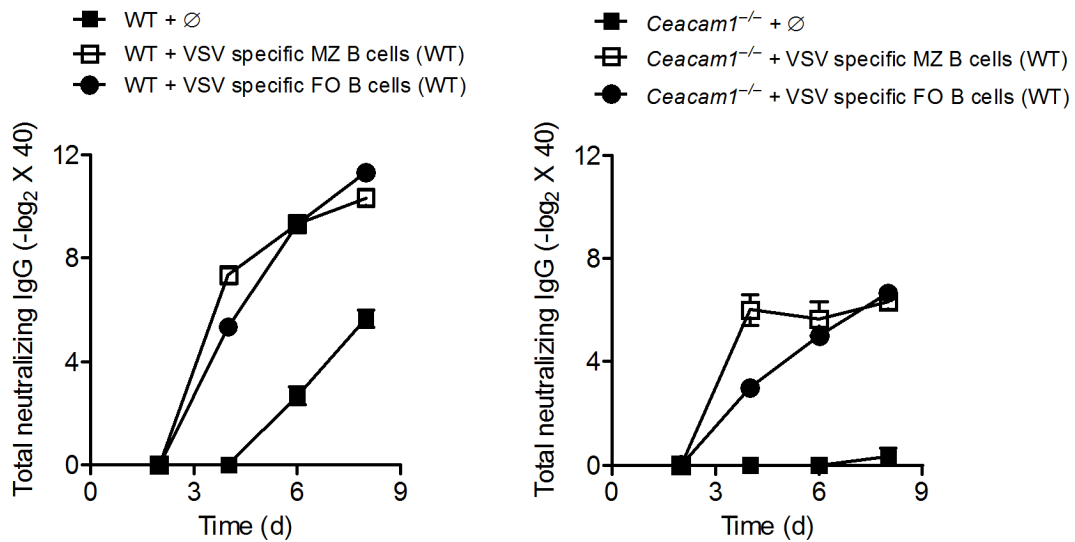

## Supplementary Figure 8: MZ and FO B cells can rescue survival in *Ceacam1*<sup>-/-</sup> mice

Histogram showing total VSV neutralizing antibody response (a) and neutralizing IgG antibodies (b) measured in sera of wild-type (WT) and *Ceacam1*<sup>-/-</sup> mice that also received  $10 \times 10^6$  MZ and  $1 \times 10^6$  FO VSV-specific B cells (Vi10) on day -1 and were then intravenously infected with  $2 \times 10^6$  PFU VSV on day 0 (n = 3 per group).



# Supplementary Figure 9

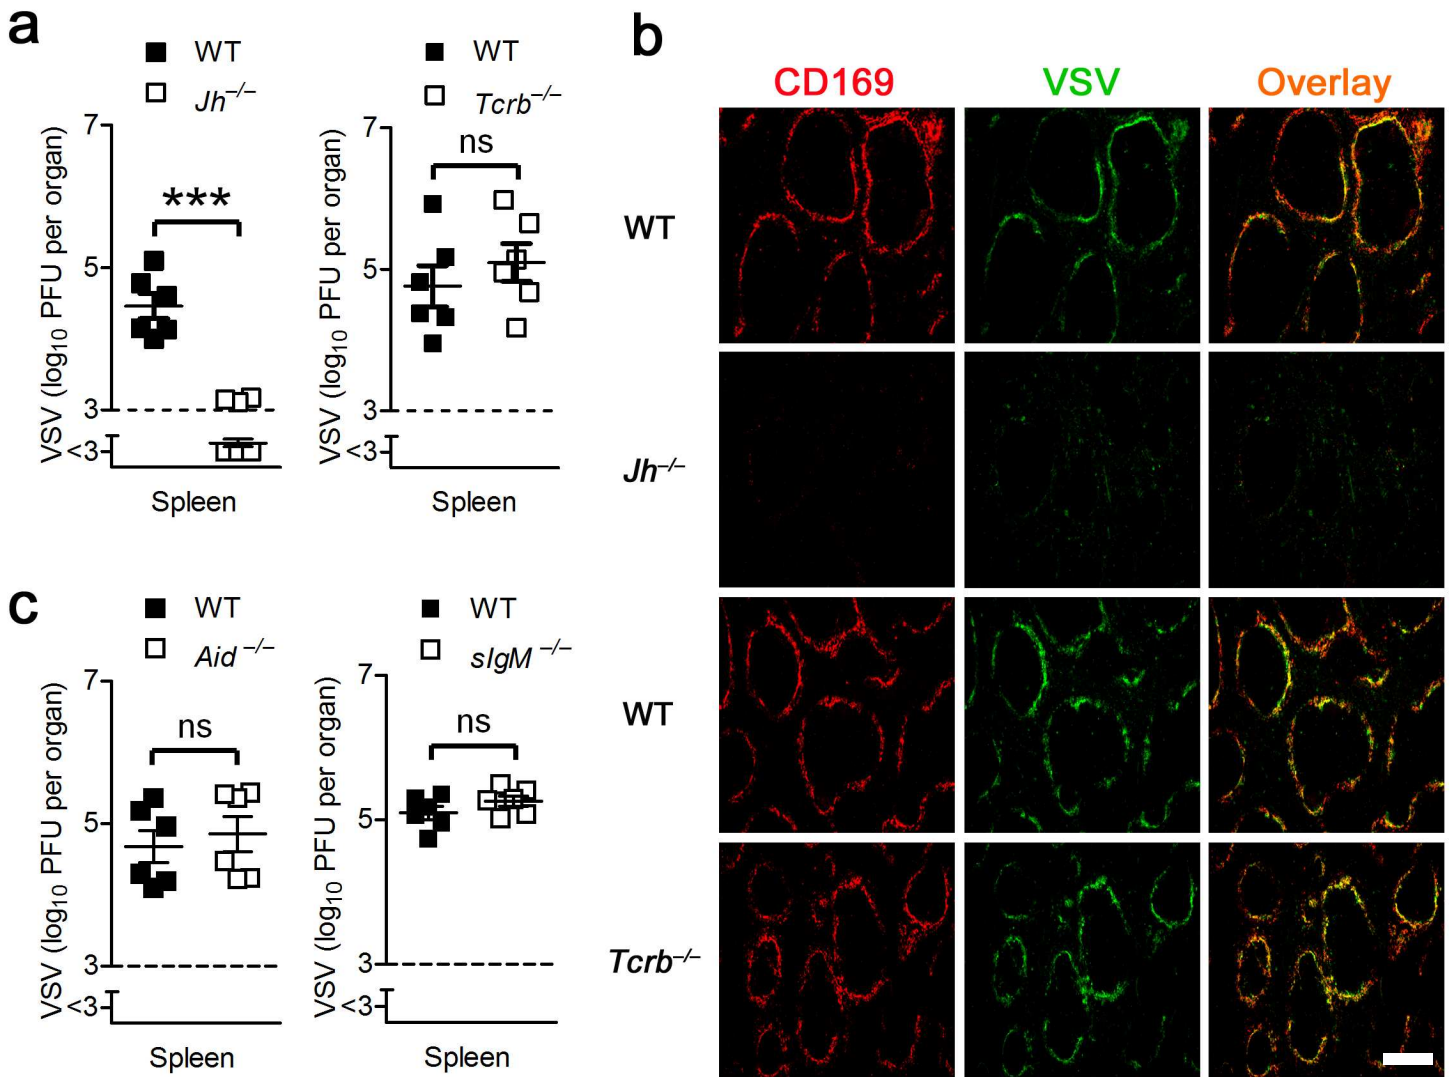

**Supplementary Figure 9: B cells but not other cell types are important for the replication of vesicular stomatitis virus in the spleen and the activation of adaptive immunity.** **a:** Spleen vesicular stomatitis virus (VSV) titers from wild-type (WT) or *Jh*<sup>-/-</sup> mice or from WT or *Tcrb*<sup>-/-</sup> mice (n = 6 per genotype) 7 h after intravenous infection with 2 × 10<sup>6</sup> PFU of VSV. **b:** Immunofluorescence assay of spleen sections from WT or *Jh*<sup>-/-</sup> mice or from WT or *Tcrb*<sup>-/-</sup> mice 7 h after intravenous infection with 2 × 10<sup>8</sup> PFU of VSV stained with VSV glycoprotein (green) and CD169 (red). One of six representative slides is shown. **c:** Spleen VSV titers from WT or *Aid*<sup>-/-</sup> mice or from WT or *slgM*<sup>-/-</sup> mice (n = 6 per genotype) 7 h after intravenous infection with 2 × 10<sup>6</sup> PFU of VSV. Scale bars, 300 μm. \*\*\**P* < 0.001 (Student's t-test); ns = not significant. Data are representative of two (a & c) experiments. One representative slide of six (b) slides is shown (mean ± SEM, a, c).

# Supplementary Figure 10

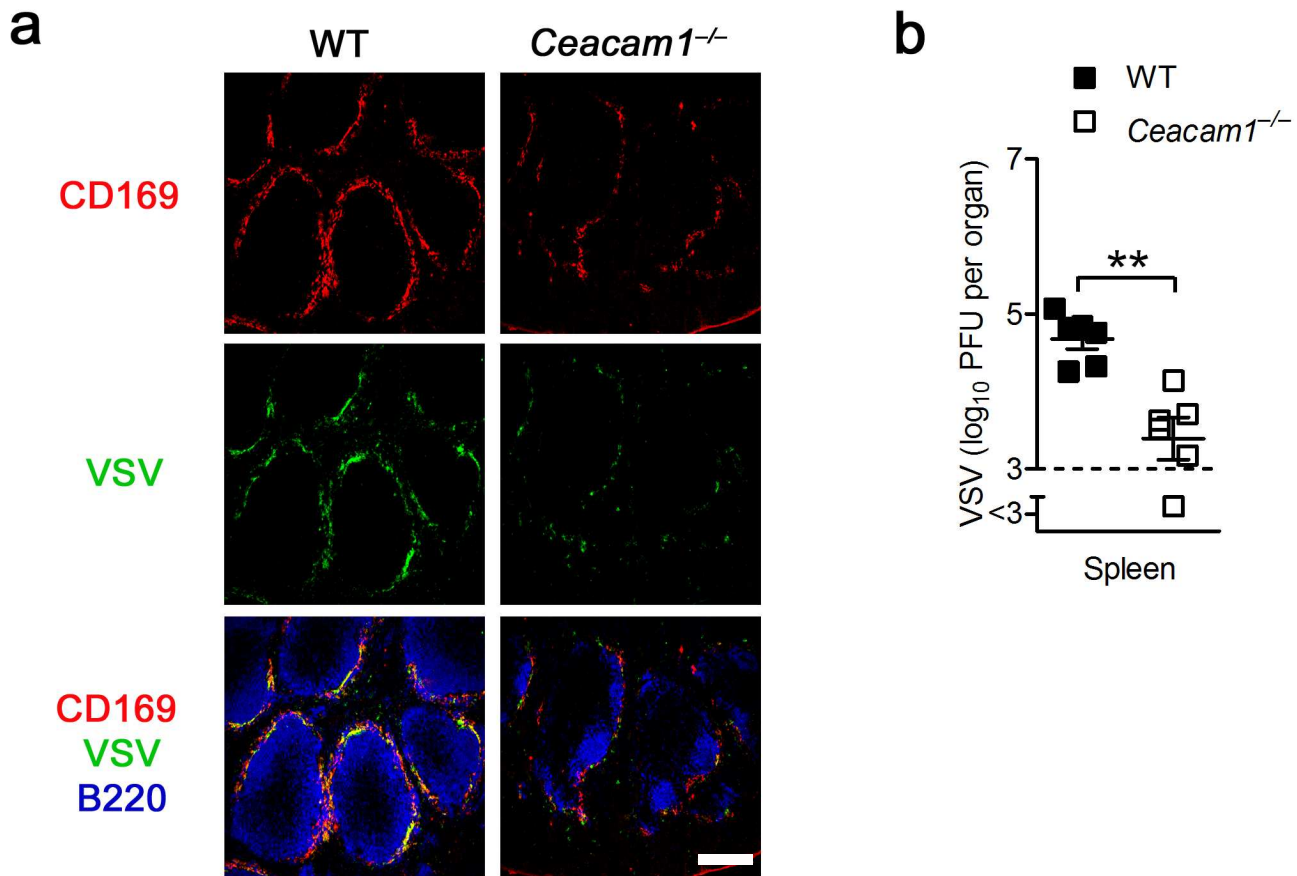

## Supplementary Figure 10: Deficient marginal zone in *Ceacam1*<sup>-/-</sup> mice limits antiviral innate immune response

**a:** Immunofluorescence of spleen sections from wild-type (WT) or *Ceacam1*<sup>-/-</sup> mice 7 h after intravenous infection with  $2 \times 10^8$  PFU of vesicular stomatitis virus (VSV), stained for VSV glycoprotein (green), CD169 (red), and B220 (blue) ( $n = 6$  per genotype). One of six representative slides is shown. Scale bar, 300  $\mu\text{m}$ . **b:** Spleen VSV titers from WT or *Ceacam1*<sup>-/-</sup> mice 7 h after intravenous infection with  $2 \times 10^6$  PFU of VSV ( $n = 6$  per genotype).  $**P < 0.01$  (Student's t-test). Data are representative of two (b), or one of two (a) experiments (mean  $\pm$  SEM, b).
